# Supplementary material for: Blind Analysis of Food-Related IgG Identifies Five Possible Nutritional Clusters for the Italian Population: Future Implications for Pregnancy and Lactation
Source: PubMed Central journal article supplement (PMC6566756; doi:10.3390/nu11051096), 2019-05-17
Supplement: nutrients-11-01096-s001.pdf [file nutrients-11-01096-s001.pdf]

Frequency distribution of IgG for almond

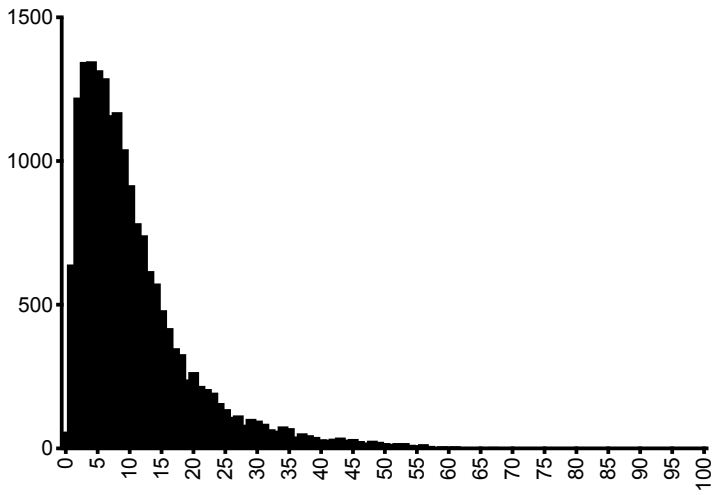

Frequency distribution of IgG for *Aspergillus fumigatus*

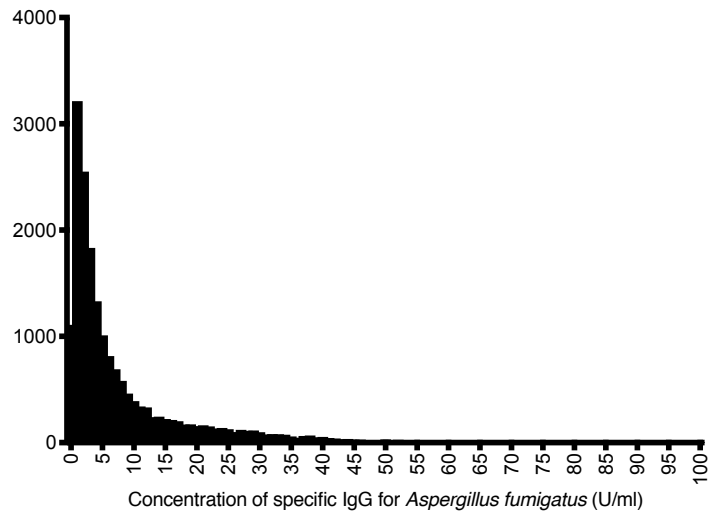

Frequency distribution of IgG for barley

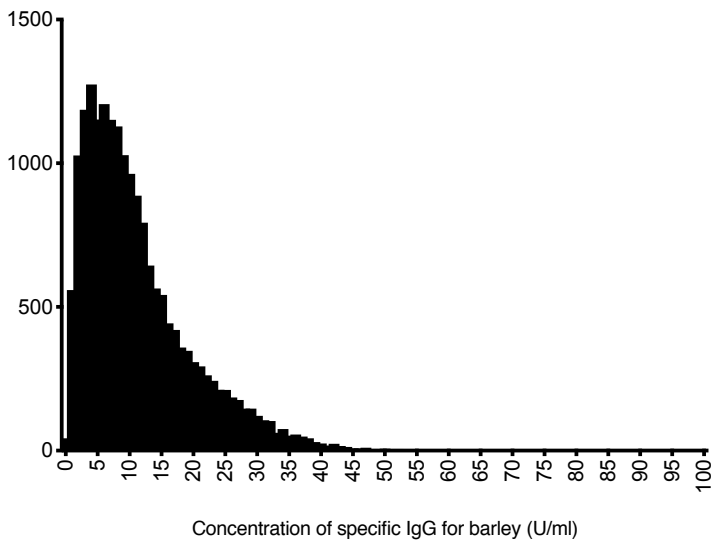

Frequency distribution of IgG for barley malt

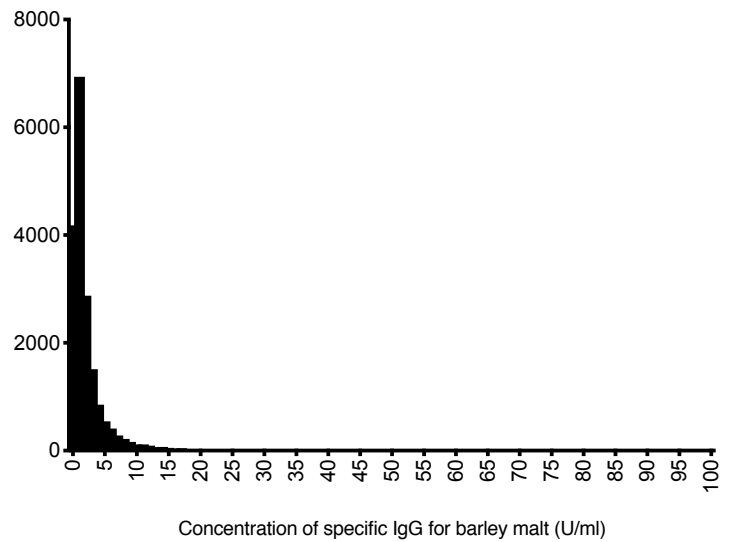

Frequency distribution of IgG for buckwheat

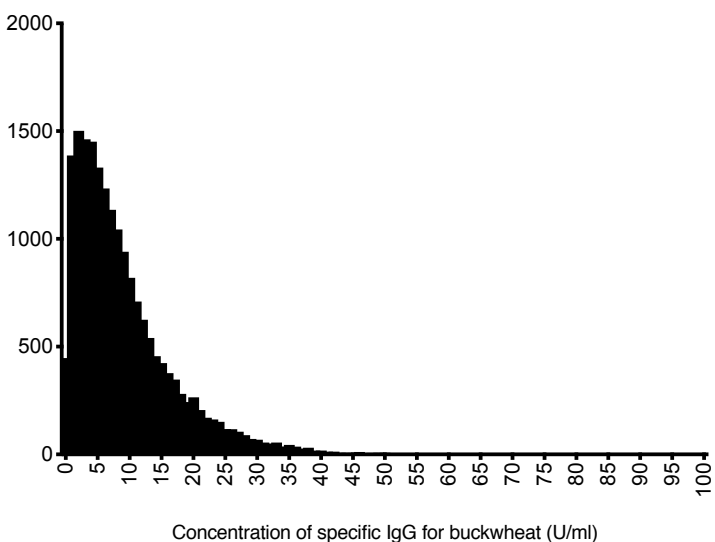

Frequency distribution of IgG for *Candida albicans*

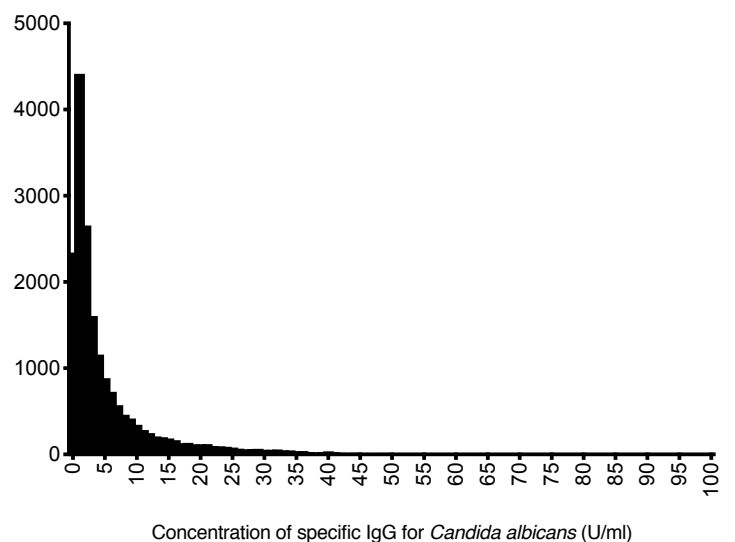

Frequency distribution of IgG for canned tuna

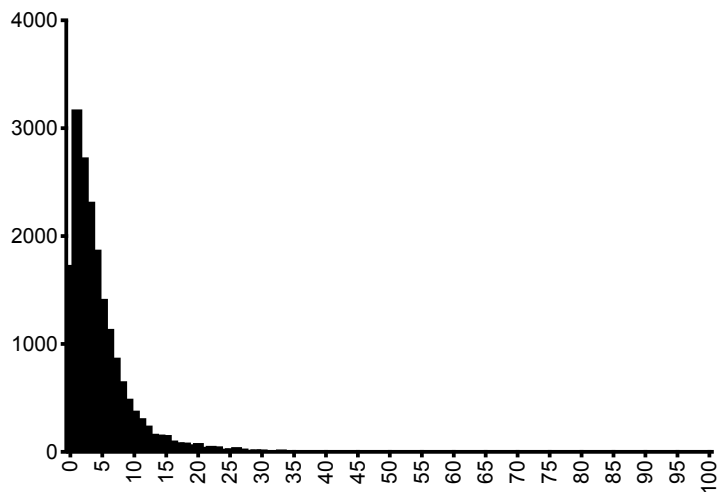

Concentration of specific IgG for canned tuna (U/ml)

Frequency distribution of IgG for champignon mushrooms

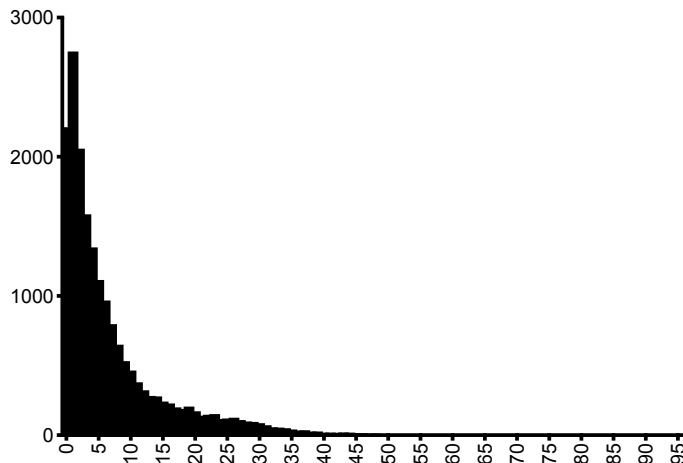

Concentration of specific IgG for champignon mushrooms (U/ml)

Frequency distribution of IgG for chicken

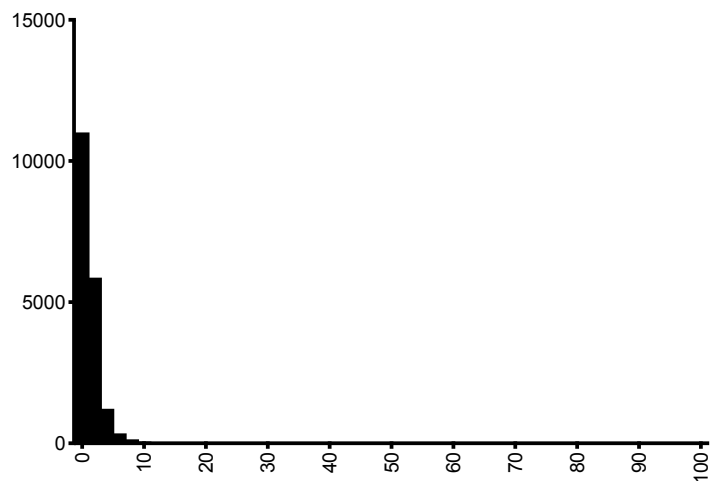

Concentration of specific IgG for chicken (U/ml)

Frequency distribution of IgG for corn

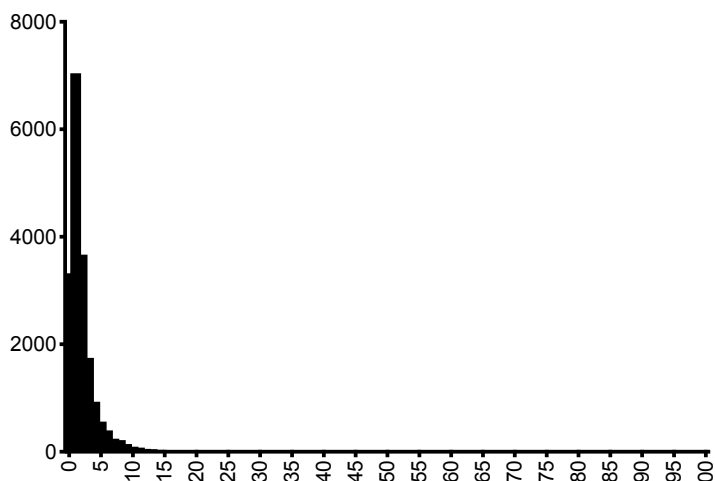

Concentration of specific IgG for corn (U/ml)

Frequency distribution of IgG for red grape

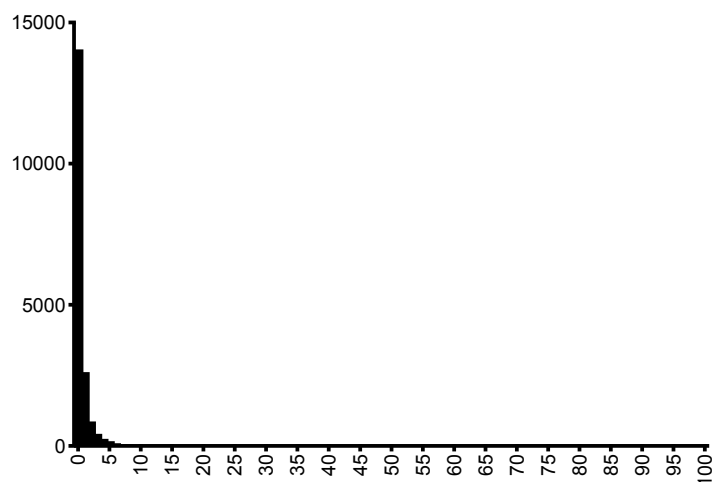

Concentration of specific IgG for red grape (U/ml)

Frequency distribution of IgG for goat milk

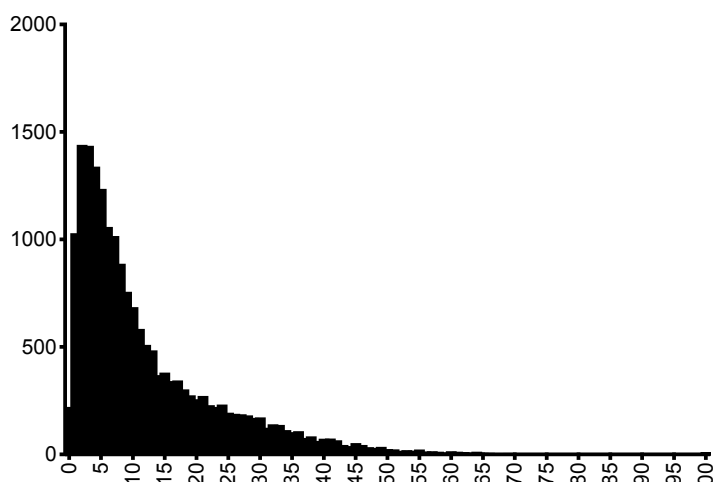

Concentration of specific IgG for goat milk (U/ml)

Frequency distribution of IgG for hazelnut

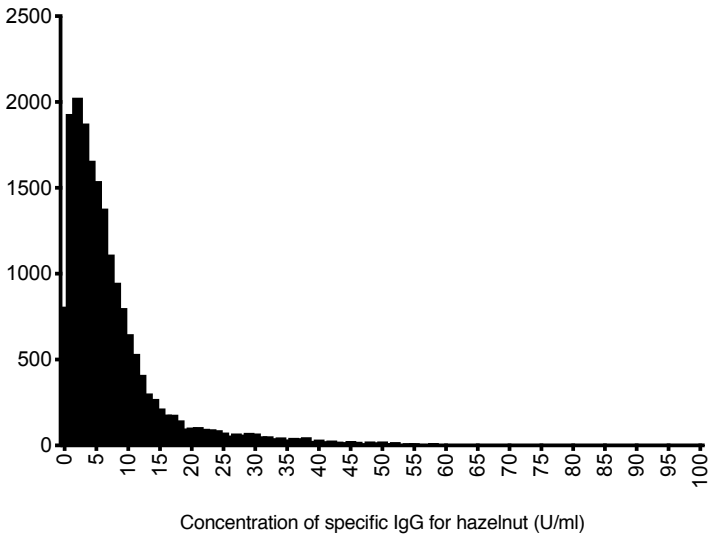

Frequency distribution of IgG for honey

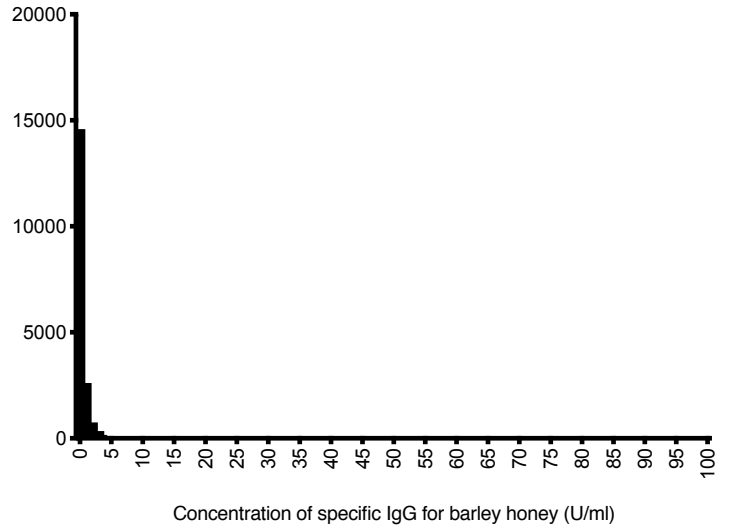

Frequency distribution of IgG for kamut

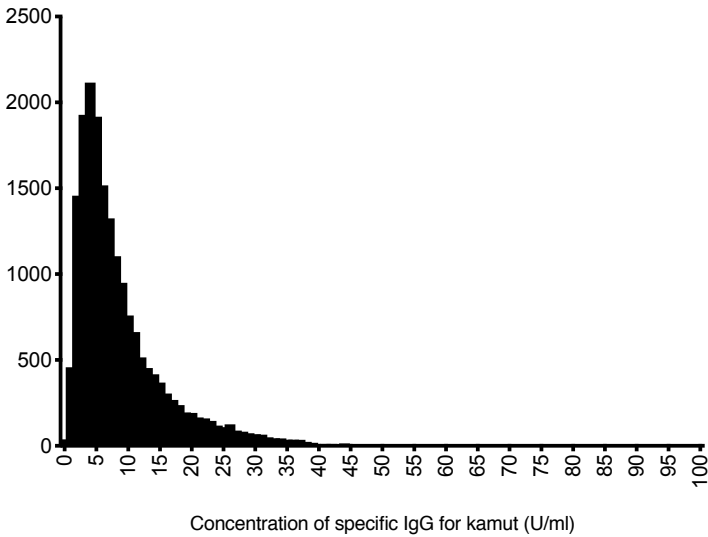

Frequency distribution of IgG for kiwi

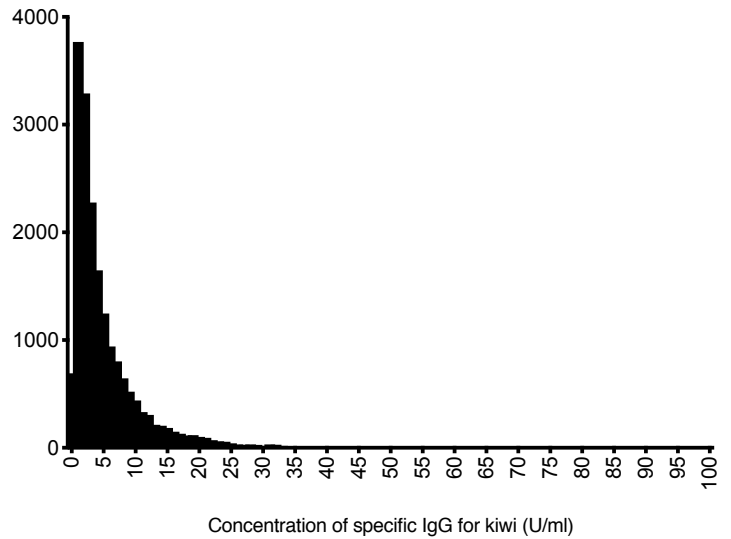

Frequency distribution of IgG for lentil

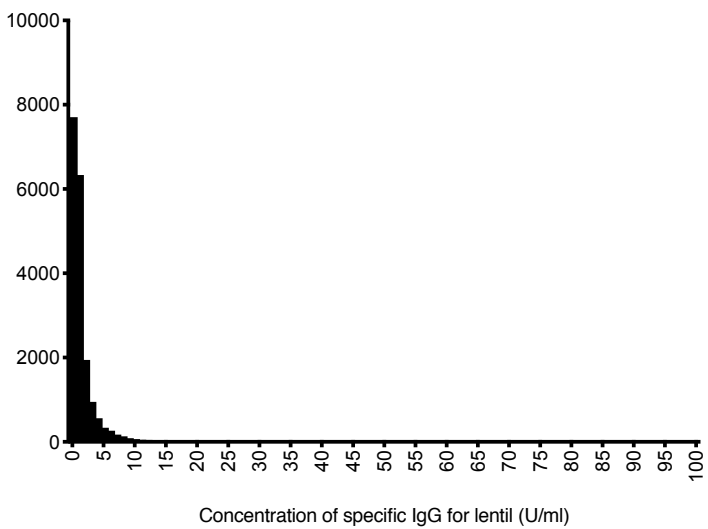

Frequency distribution of IgG for mozzarella cheese

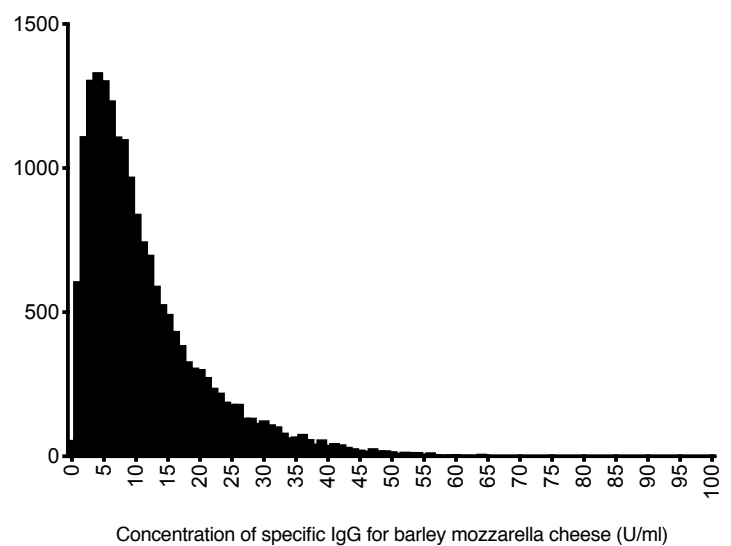

Frequency distribution of IgG for oat

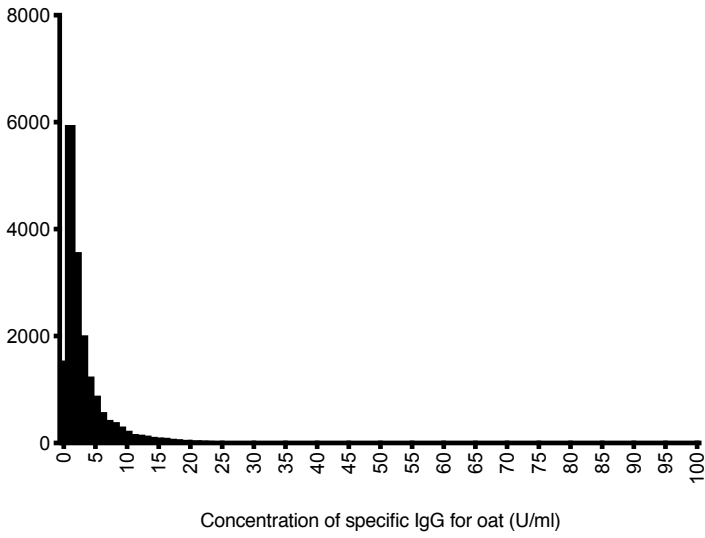

Frequency distribution of IgG for olive

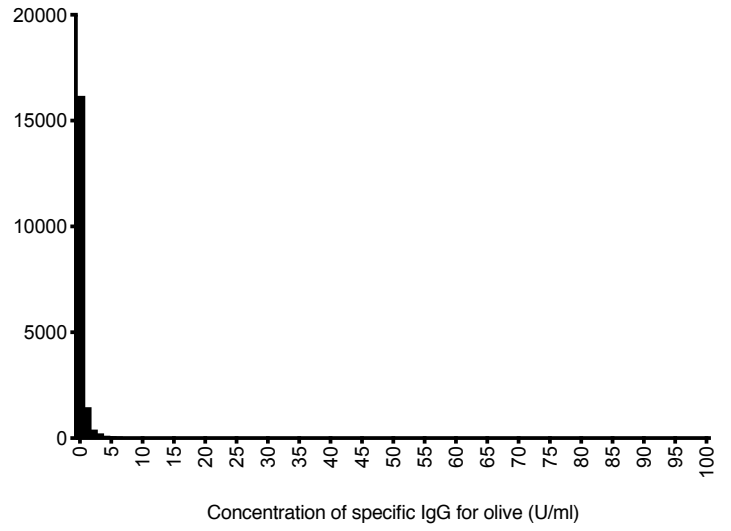

Frequency distribution of IgG for onion

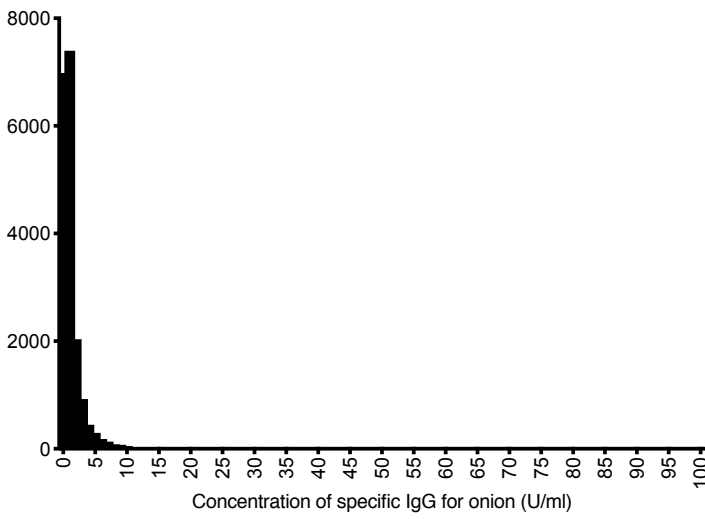

Frequency distribution of IgG for orange

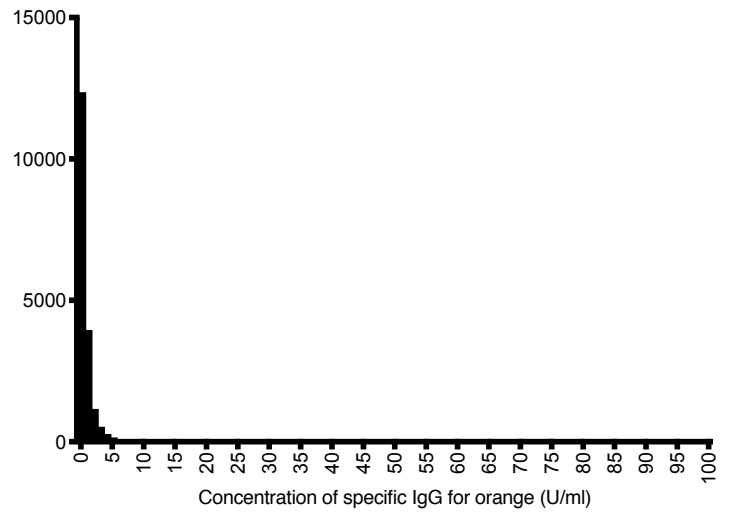

Frequency distribution of IgG for parmesan cheese

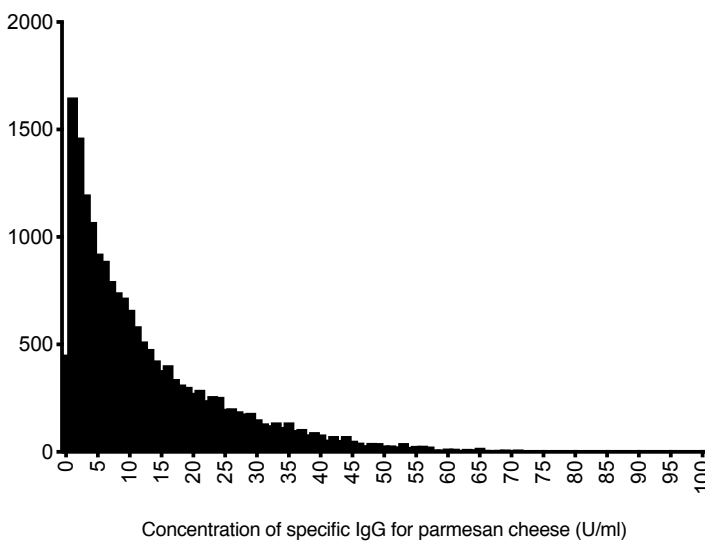

Frequency distribution of IgG for peach

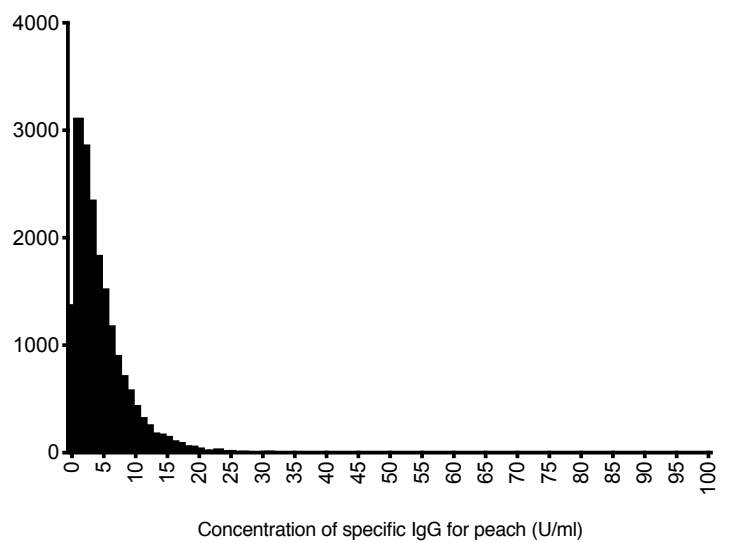

Frequency distribution of IgG for porcini mushrooms

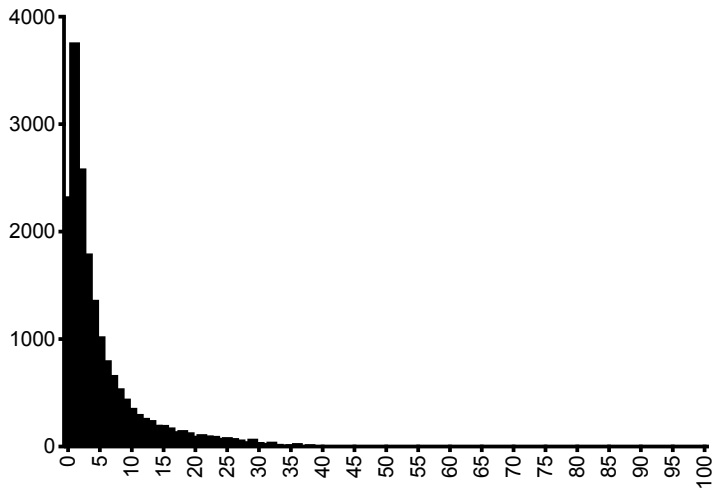

Concentration of specific IgG for porcini mushrooms (U/ml)

Frequency distribution of IgG for potato

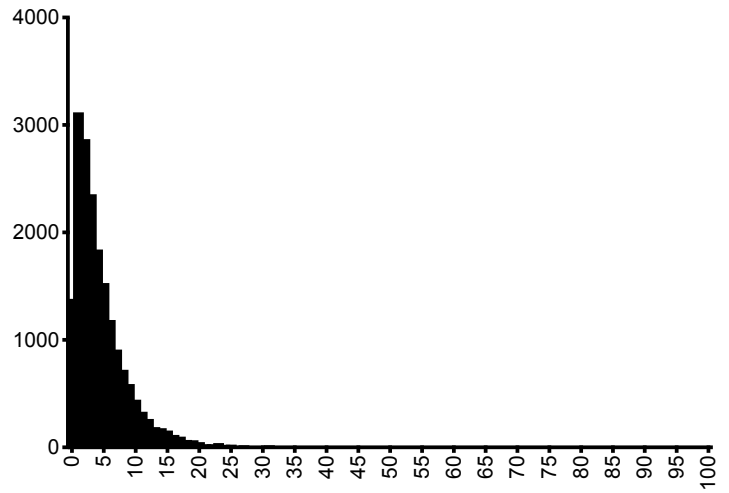

Concentration of specific IgG for potato (U/ml)

Frequency distribution of IgG for red grape

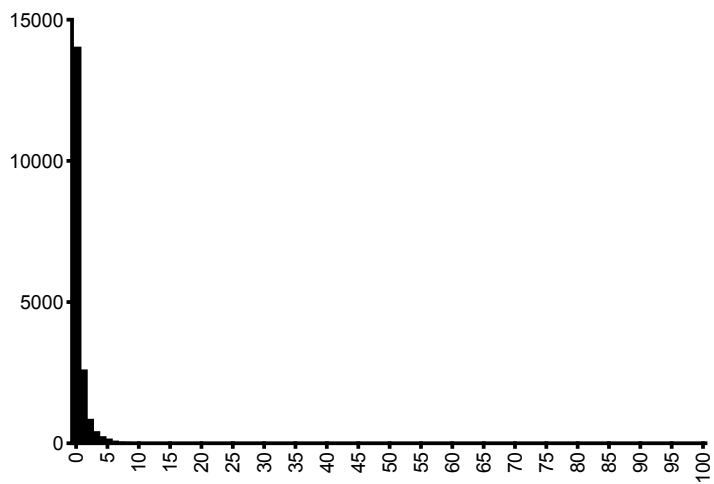

Concentration of specific IgG for red grape (U/ml)

Frequency distribution of IgG for rice

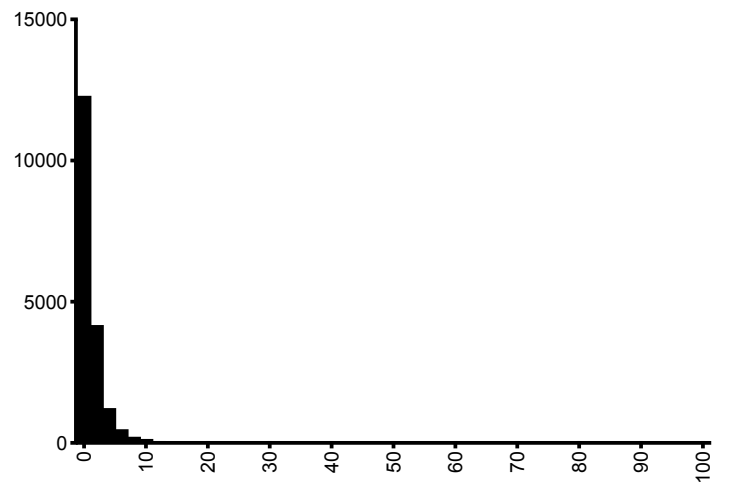

Concentration of specific IgG for rice (U/ml)

Frequency distribution of IgG for ricotta cheese

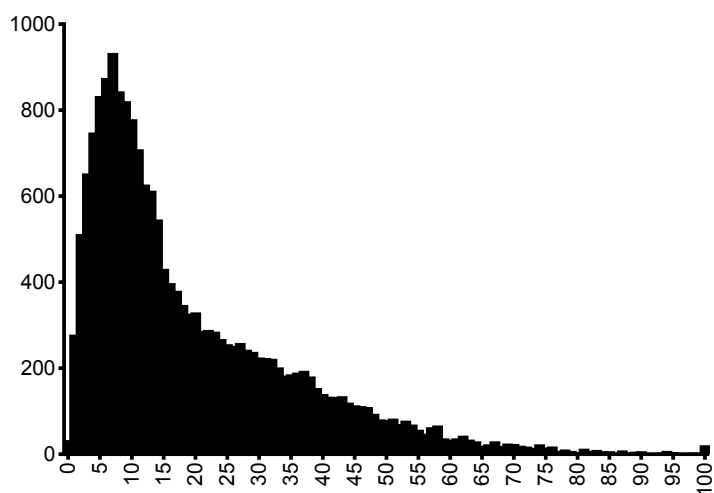

Concentration of specific IgG for ricotta cheese (U/ml)

Frequency distribution of IgG for rye

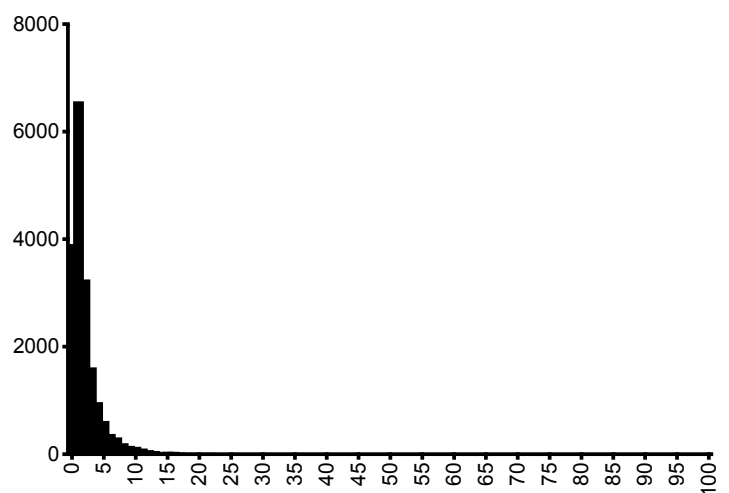

Concentration of specific IgG for rye (U/ml)

Frequency distribution of IgG for soy

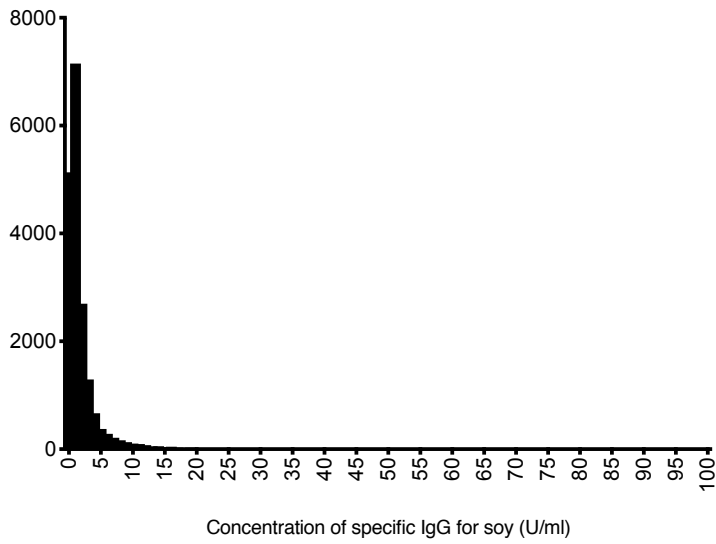

Frequency distribution of IgG for spinach

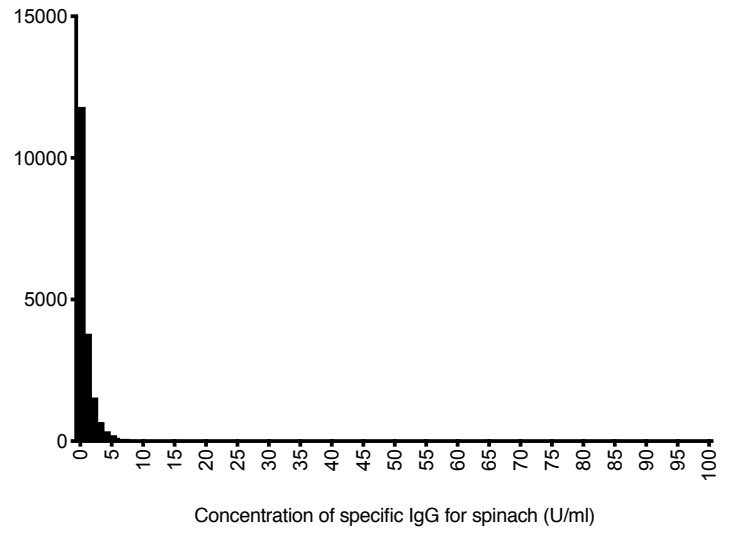

Frequency distribution of IgG for tea

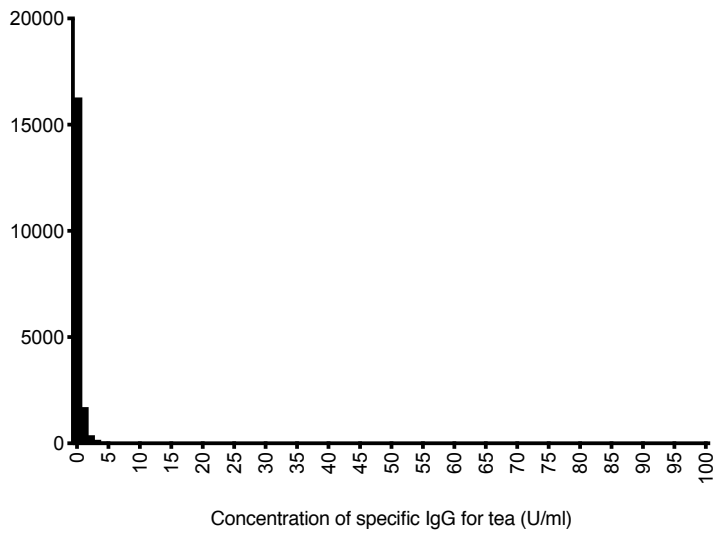

Frequency distribution of IgG for walnut

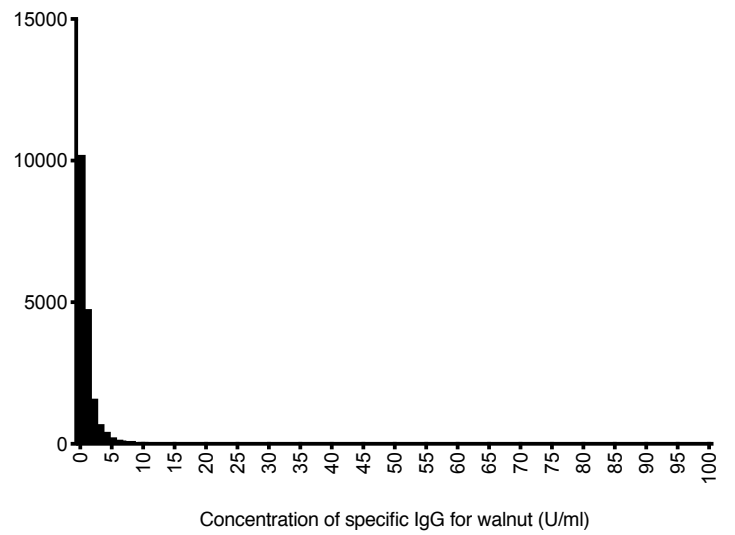

Frequency distribution of IgG for zucchini

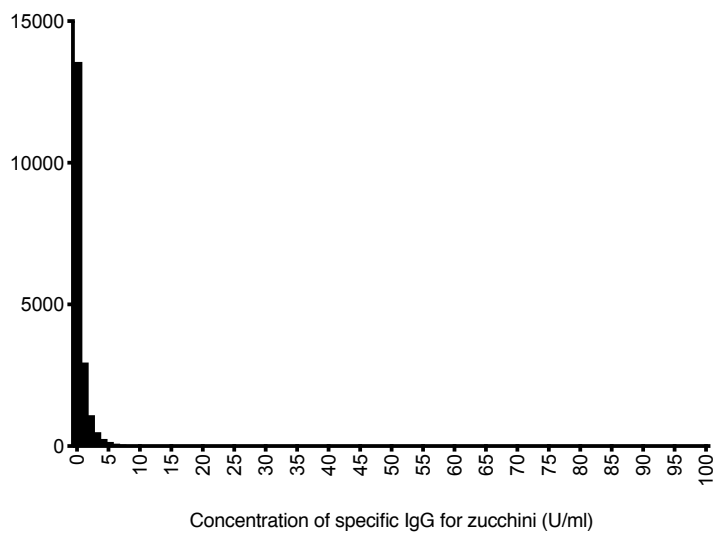

Frequency distribution of IgG for beer yeast

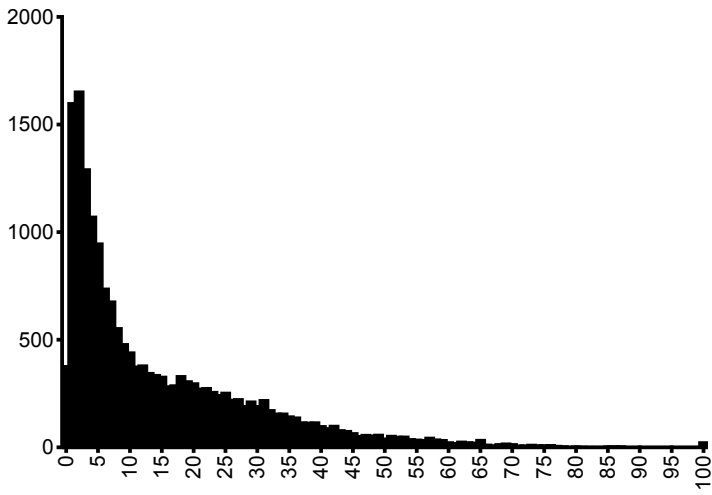

Concentration of specific IgG for beer yeast (U/ml)

Frequency distribution of IgG for durum wheat

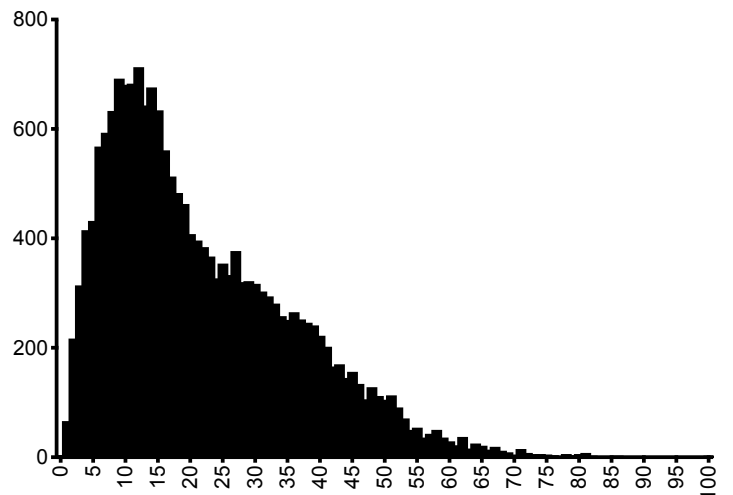

Concentration of specific IgG for durum wheat (U/ml)

Frequency distribution of IgG for pork

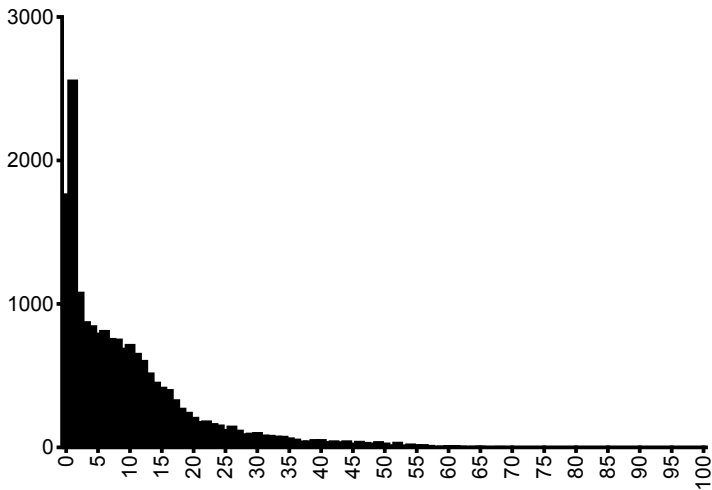

Concentration of specific IgG for pork (U/ml)

Frequency distribution of IgG for processed cheese

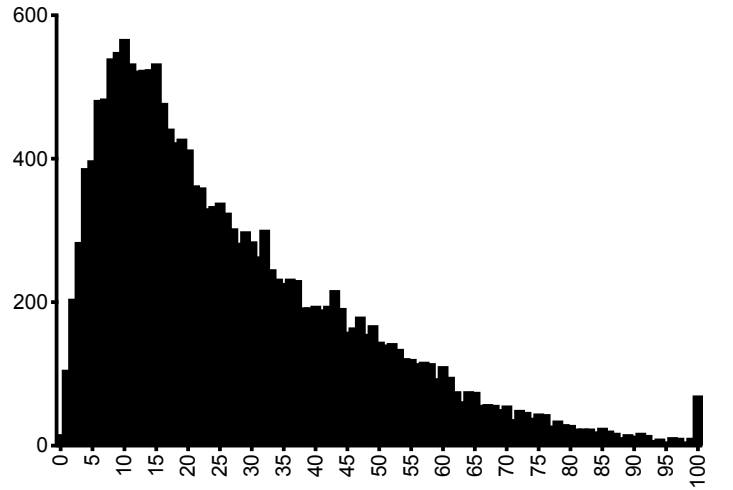

Concentration of specific IgG for processed cheese (U/ml)

Frequency distribution of IgG for spelt

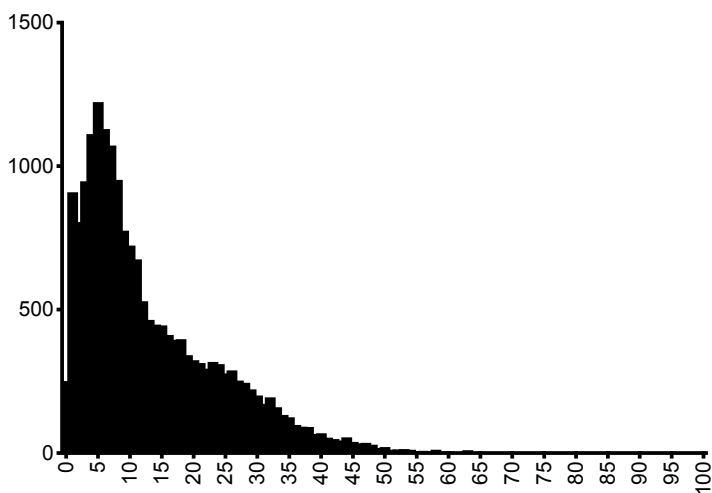

Concentration of specific IgG for spelt (U/ml)
